# Supplementary material
Source: Springer Nature journal article supplement (https://www.springermedizin.de/resource/supplementary/12889_2009_2085_MOESM4_ESM.pdf/9484540)

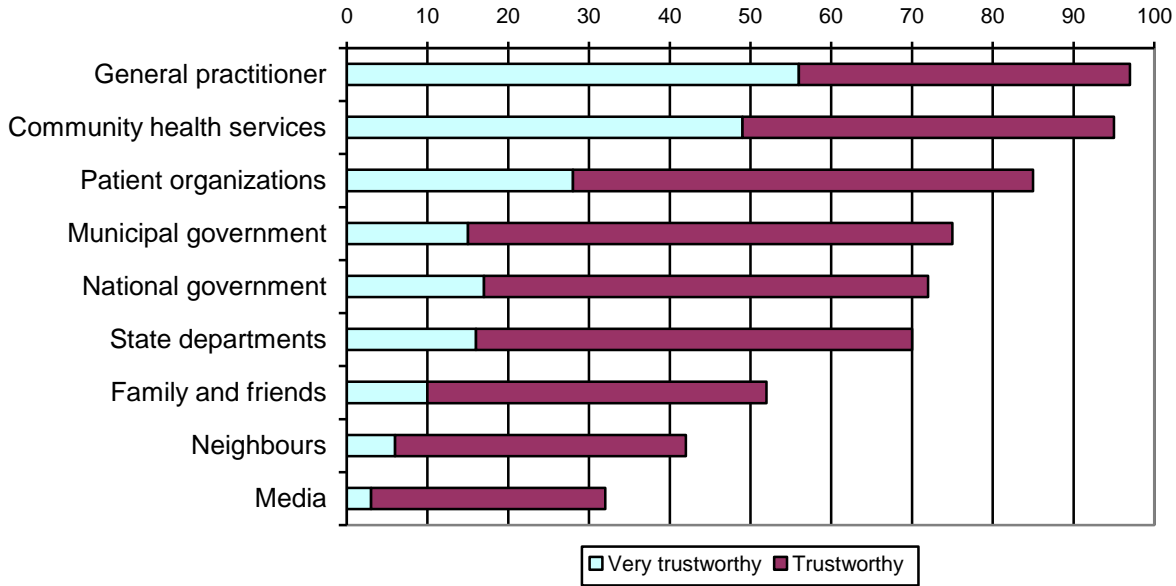

Supplement: MOESM4 [file 9484540]
